# Supplementary material for: A New Spatane Diterpenoid from the Cultured Soft Coral Sinularia leptoclados
Source: Mar Drugs. 2013 Jan 10;11(1):114–23. doi: 10.3390/md11010114 (PMC3564161; doi:10.3390/md11010114)

## Supporting Information

|                                                                                               |    |
|-----------------------------------------------------------------------------------------------|----|
| <b>Figure S1.</b> $^1\text{H}$ NMR spectrum of <b>1</b> in $\text{CDCl}_3$ at 500 MHz.        | 2  |
| <b>Figure S2.</b> $^{13}\text{C}$ NMR spectrum of <b>1</b> in $\text{CDCl}_3$ at 125 MHz.     | 3  |
| <b>Figure S3.</b> HMQC spectrum of <b>1</b> in $\text{CDCl}_3$ .                              | 4  |
| <b>Figure S4.</b> HMBC spectrum of <b>1</b> in $\text{CDCl}_3$ .                              | 5  |
| <b>Figure S5.</b> $^1\text{H}$ - $^1\text{H}$ COSY spectrum of <b>1</b> in $\text{CDCl}_3$ .  | 6  |
| <b>Figure S6.</b> NOESY spectrum of <b>1</b> in $\text{CDCl}_3$ .                             | 7  |
| <b>Figure S7.</b> $^1\text{H}$ NMR spectrum of <b>1</b> in pyridine- $d_5$ at 500 MHz.        | 8  |
| <b>Figure S8.</b> $^{13}\text{C}$ NMR spectrum of <b>1</b> in pyridine- $d_5$ at 125 MHz.     | 9  |
| <b>Figure S9.</b> HMQC spectrum of <b>1</b> in pyridine- $d_5$ .                              | 10 |
| <b>Figure S10.</b> HMBC spectrum of <b>1</b> in pyridine- $d_5$ .                             | 11 |
| <b>Figure S11.</b> $^1\text{H}$ - $^1\text{H}$ COSY spectrum of <b>1</b> in pyridine- $d_5$ . | 12 |
| <b>Figure S12.</b> NOESY spectrum of <b>1</b> in pyridine- $d_5$ .                            | 13 |

**Figure S1.**  $^1\text{H}$  NMR spectrum of **1** in  $\text{CDCl}_3$  at 500 MHz.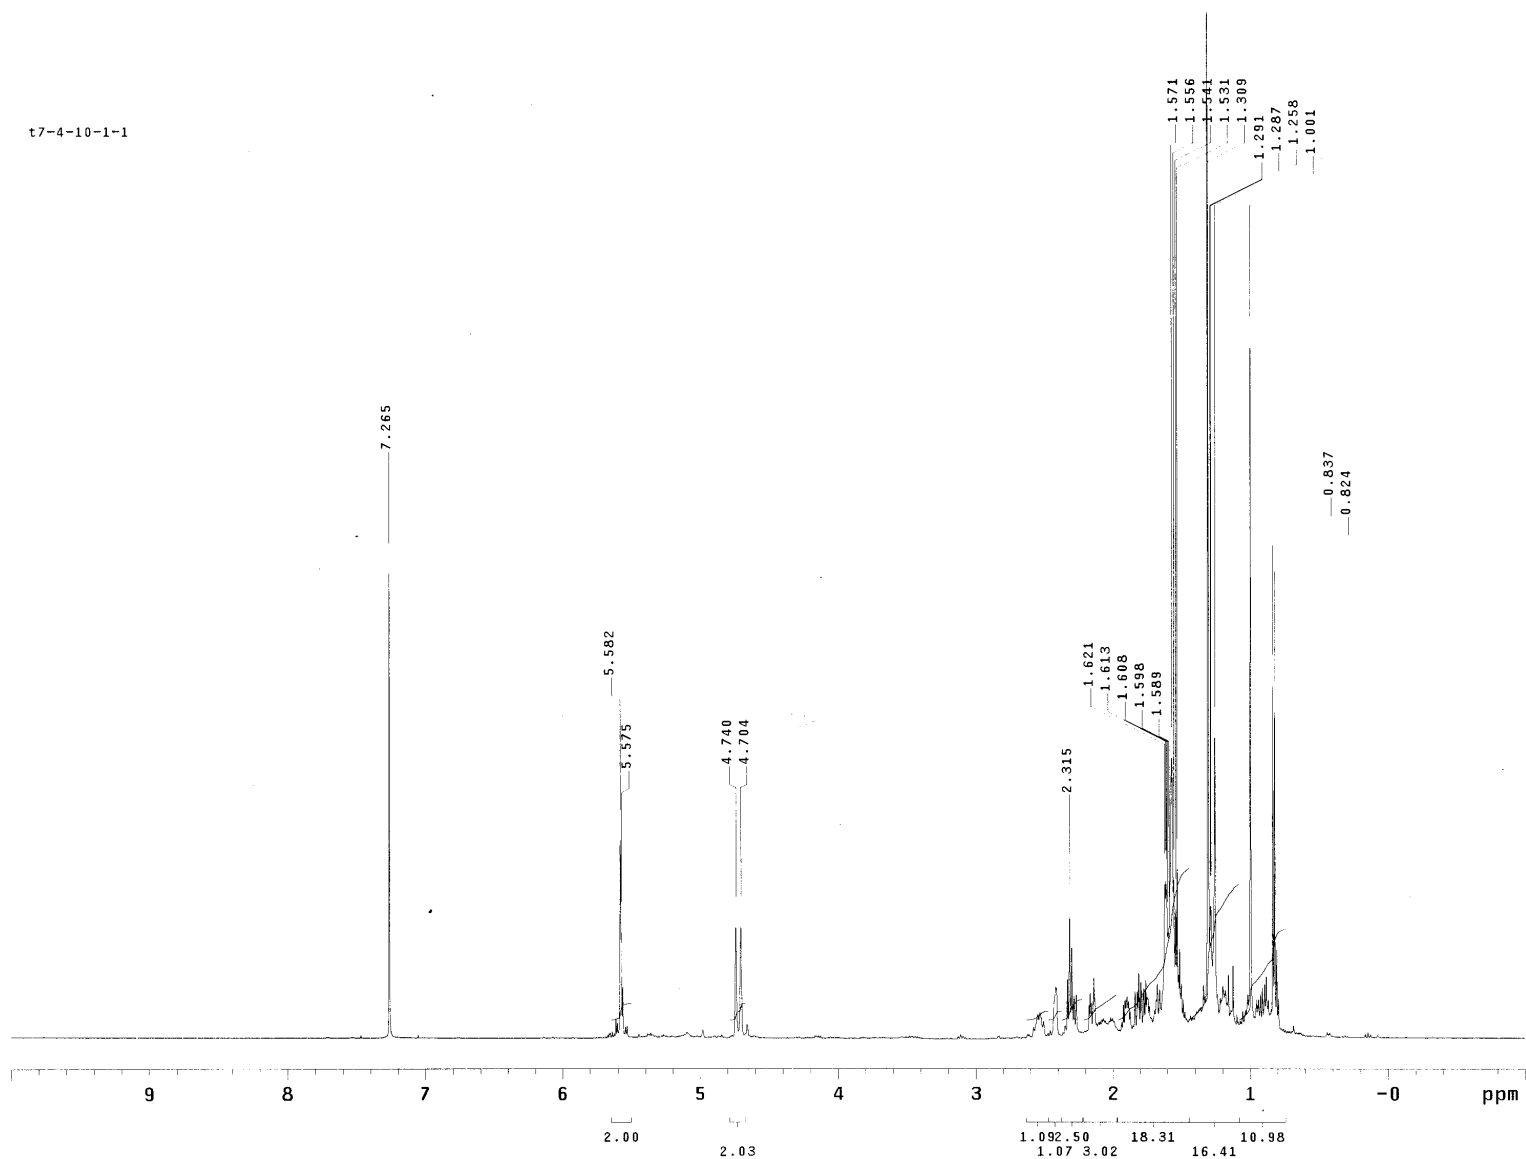

**Figure S2.**  $^{13}\text{C}$  NMR spectrum of **1** in  $\text{CDCl}_3$  at 125 MHz.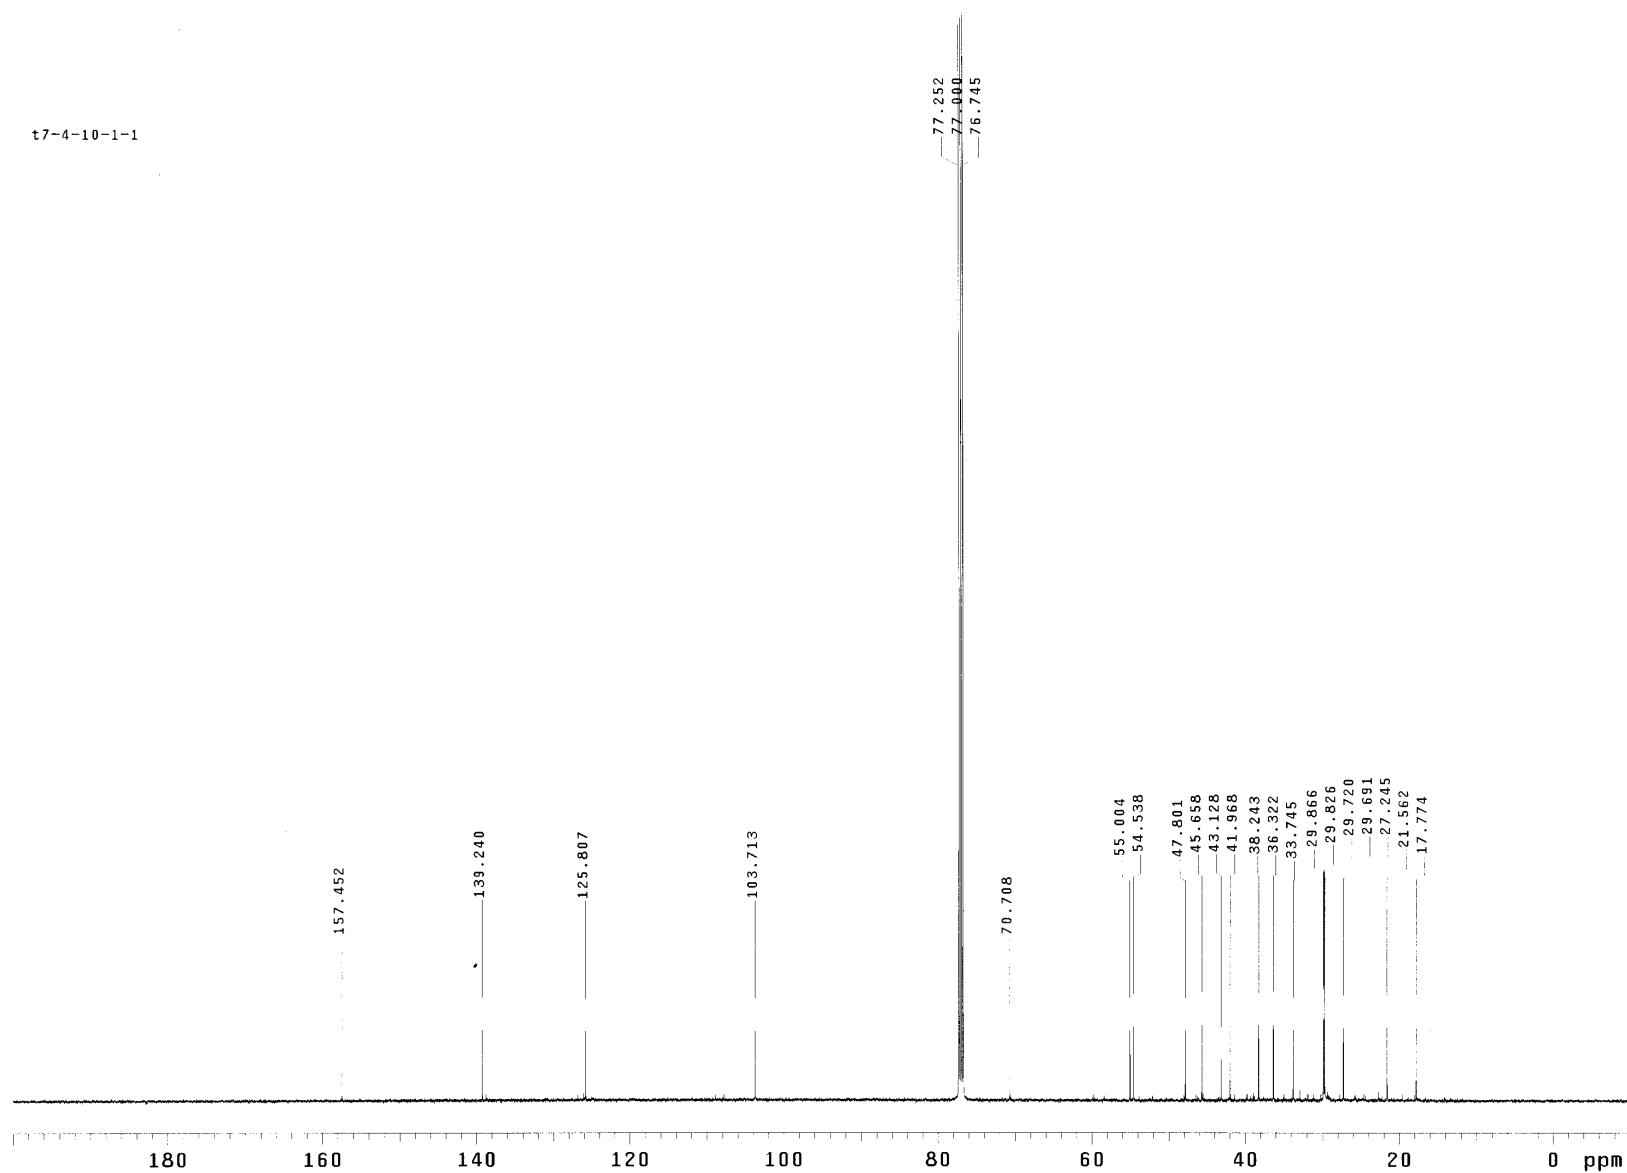

**Figure S3.** HMQC spectrum of **1** in  $\text{CDCl}_3$ .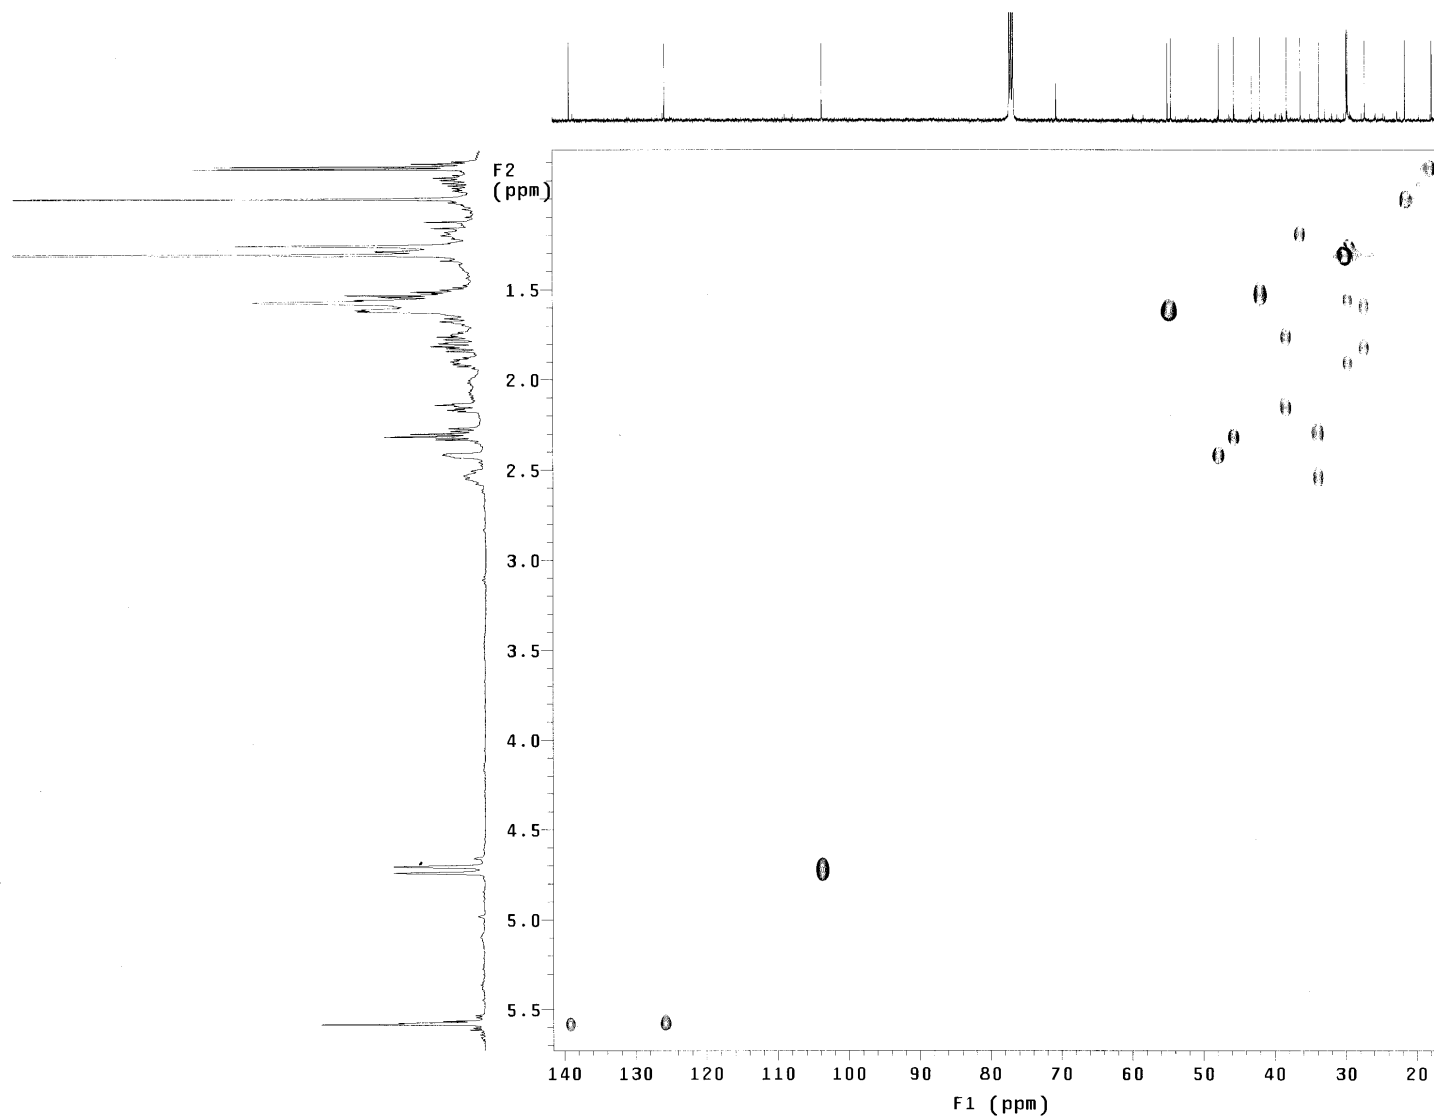

QC

**Figure S4.** HMBC spectrum of **1** in  $\text{CDCl}_3$ .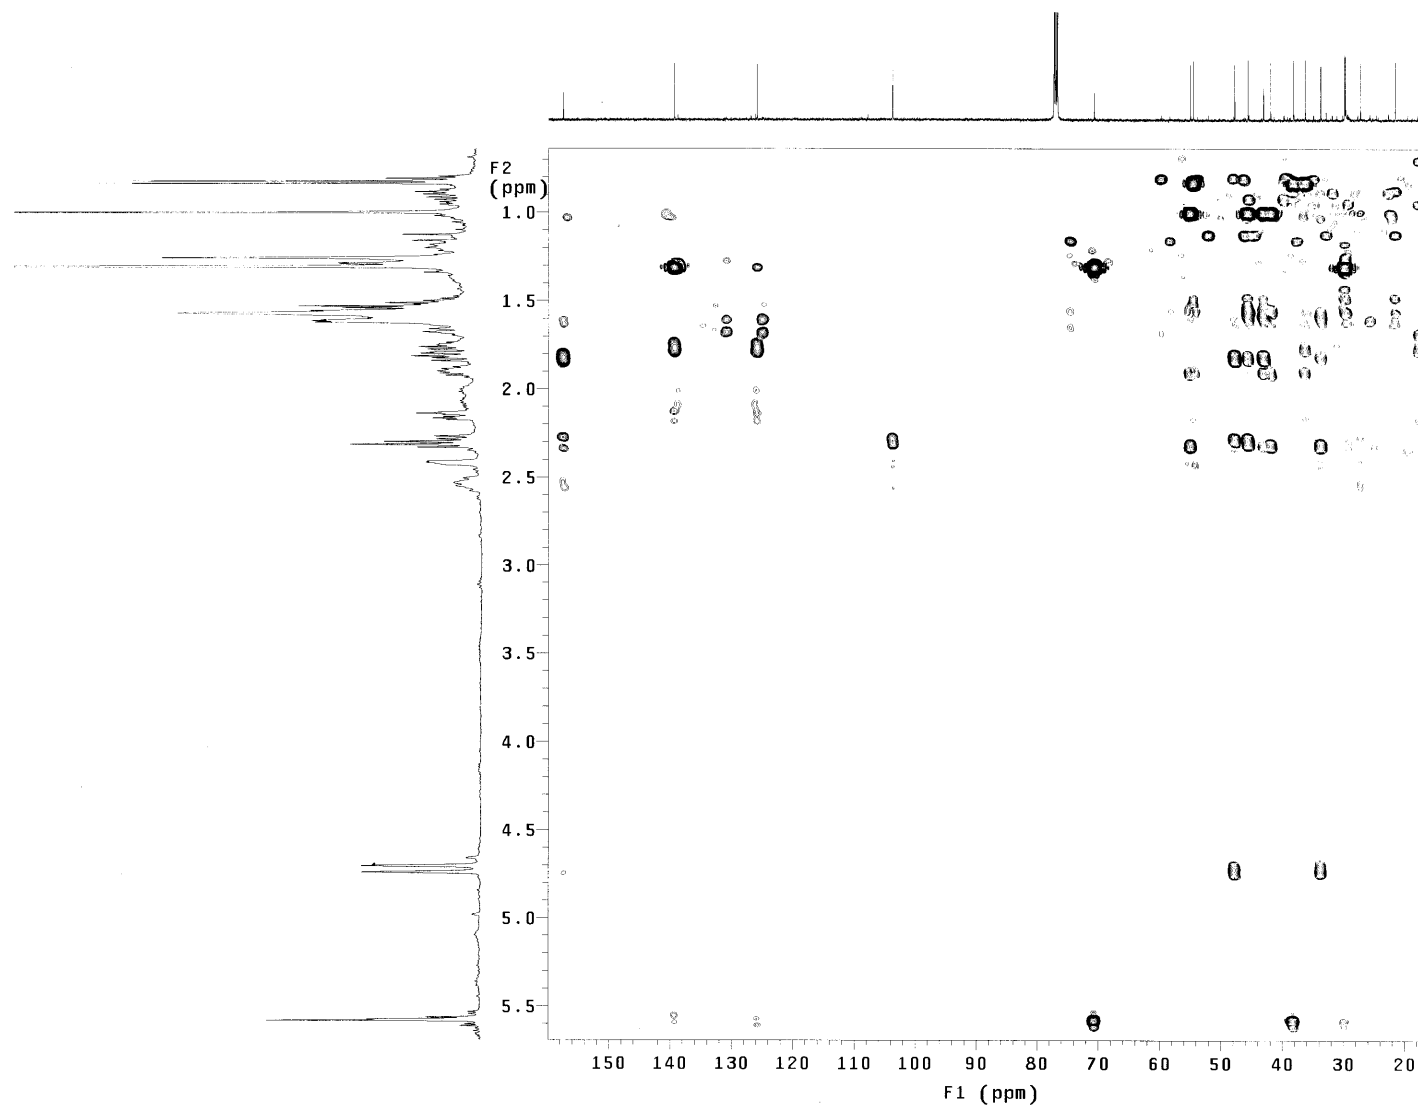

BC

**Figure S5.**  $^1\text{H}$ – $^1\text{H}$  COSY spectrum of **1** in  $\text{CDCl}_3$ .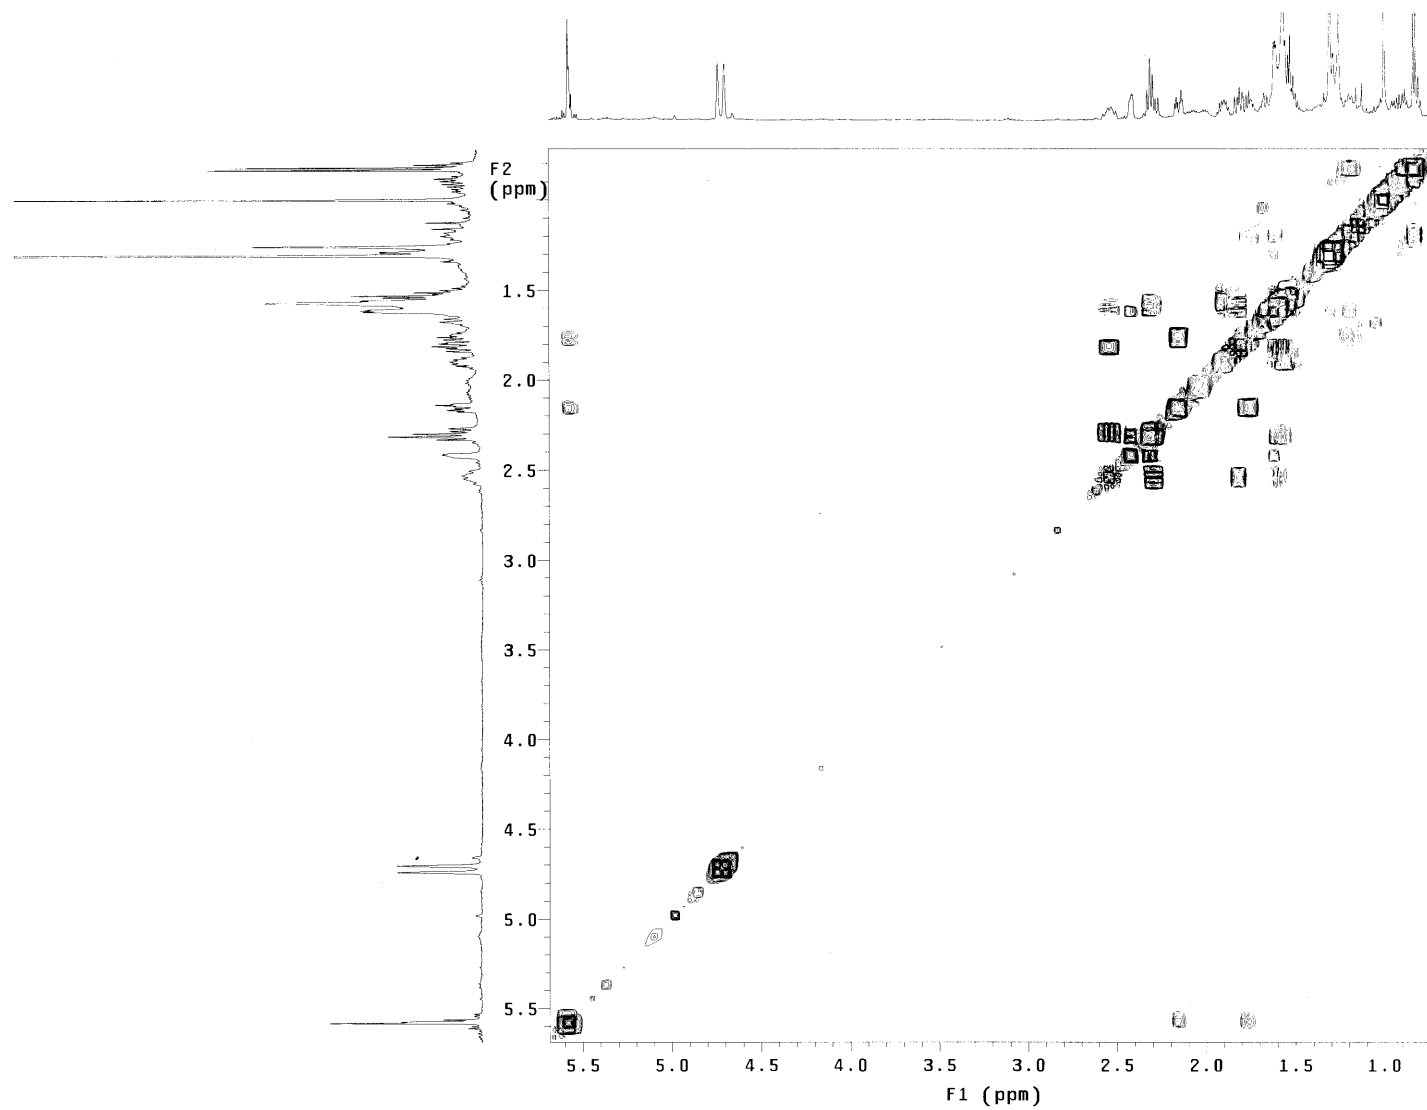

COSY

**Figure S6.** NOESY spectrum of **1** in CDCl<sub>3</sub>.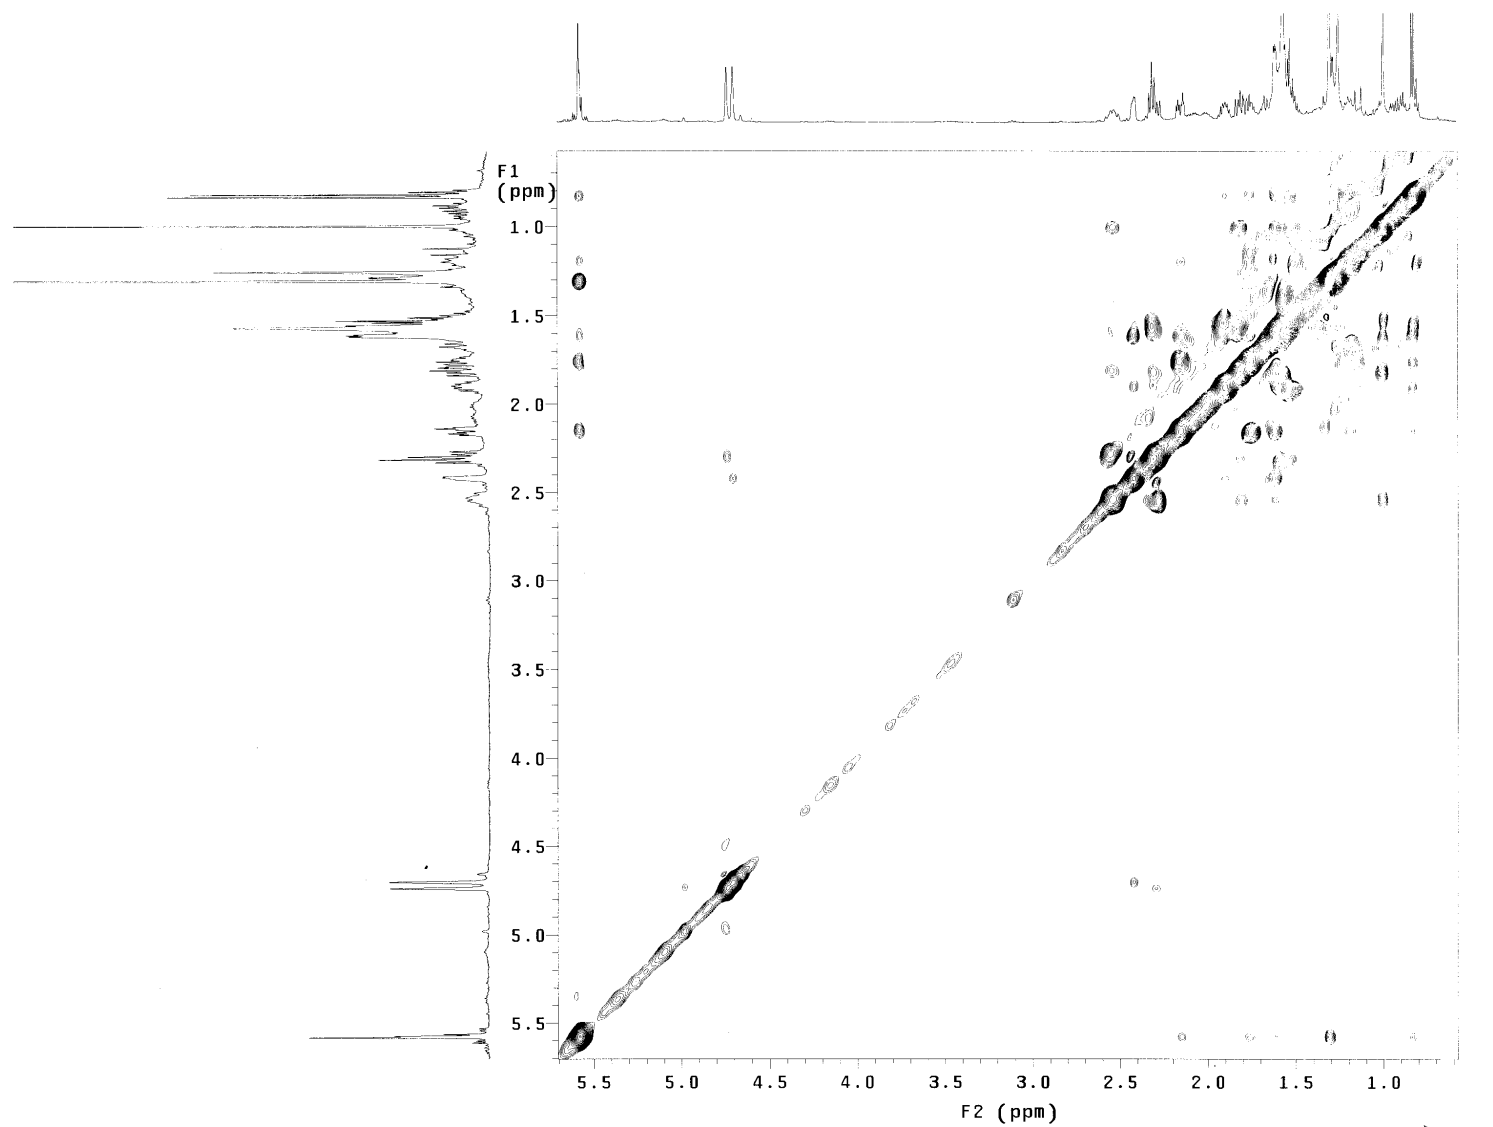

**Figure S7.**  $^1\text{H}$  NMR spectrum of **1** in pyridine- $d_5$  at 500 MHz.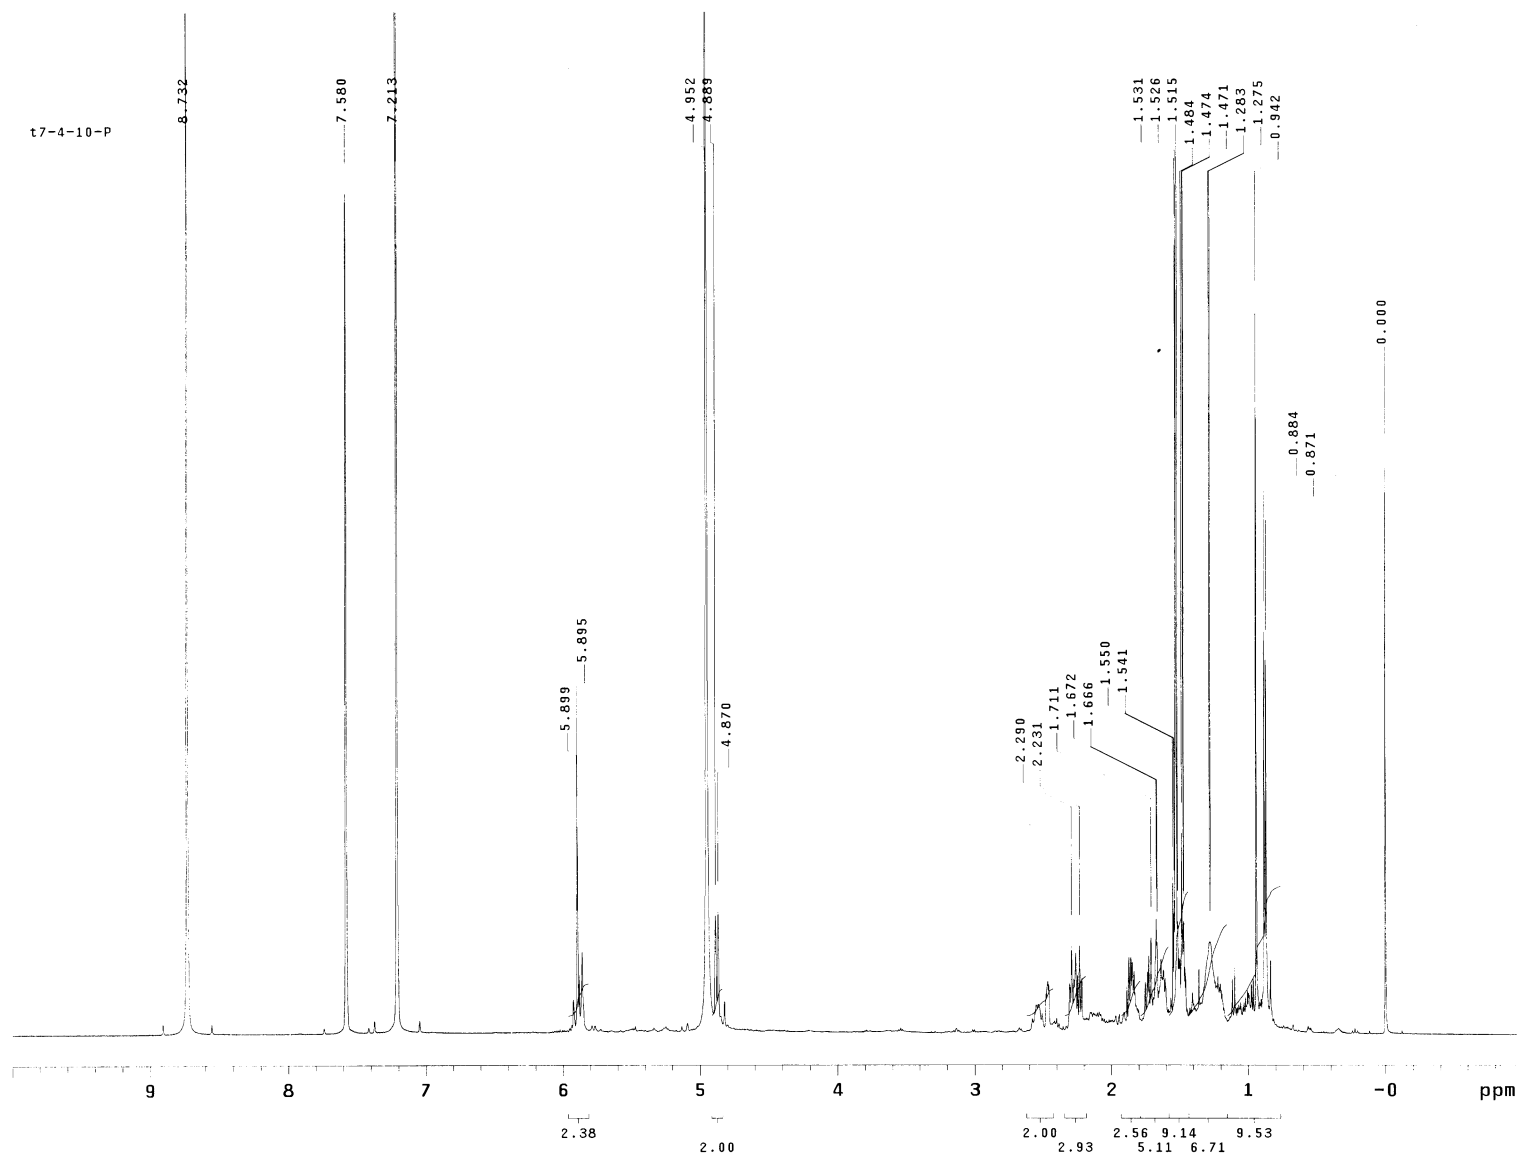

**Figure S8.**  $^{13}\text{C}$  NMR spectrum of **1** in pyridine- $d_5$  at 125 MHz.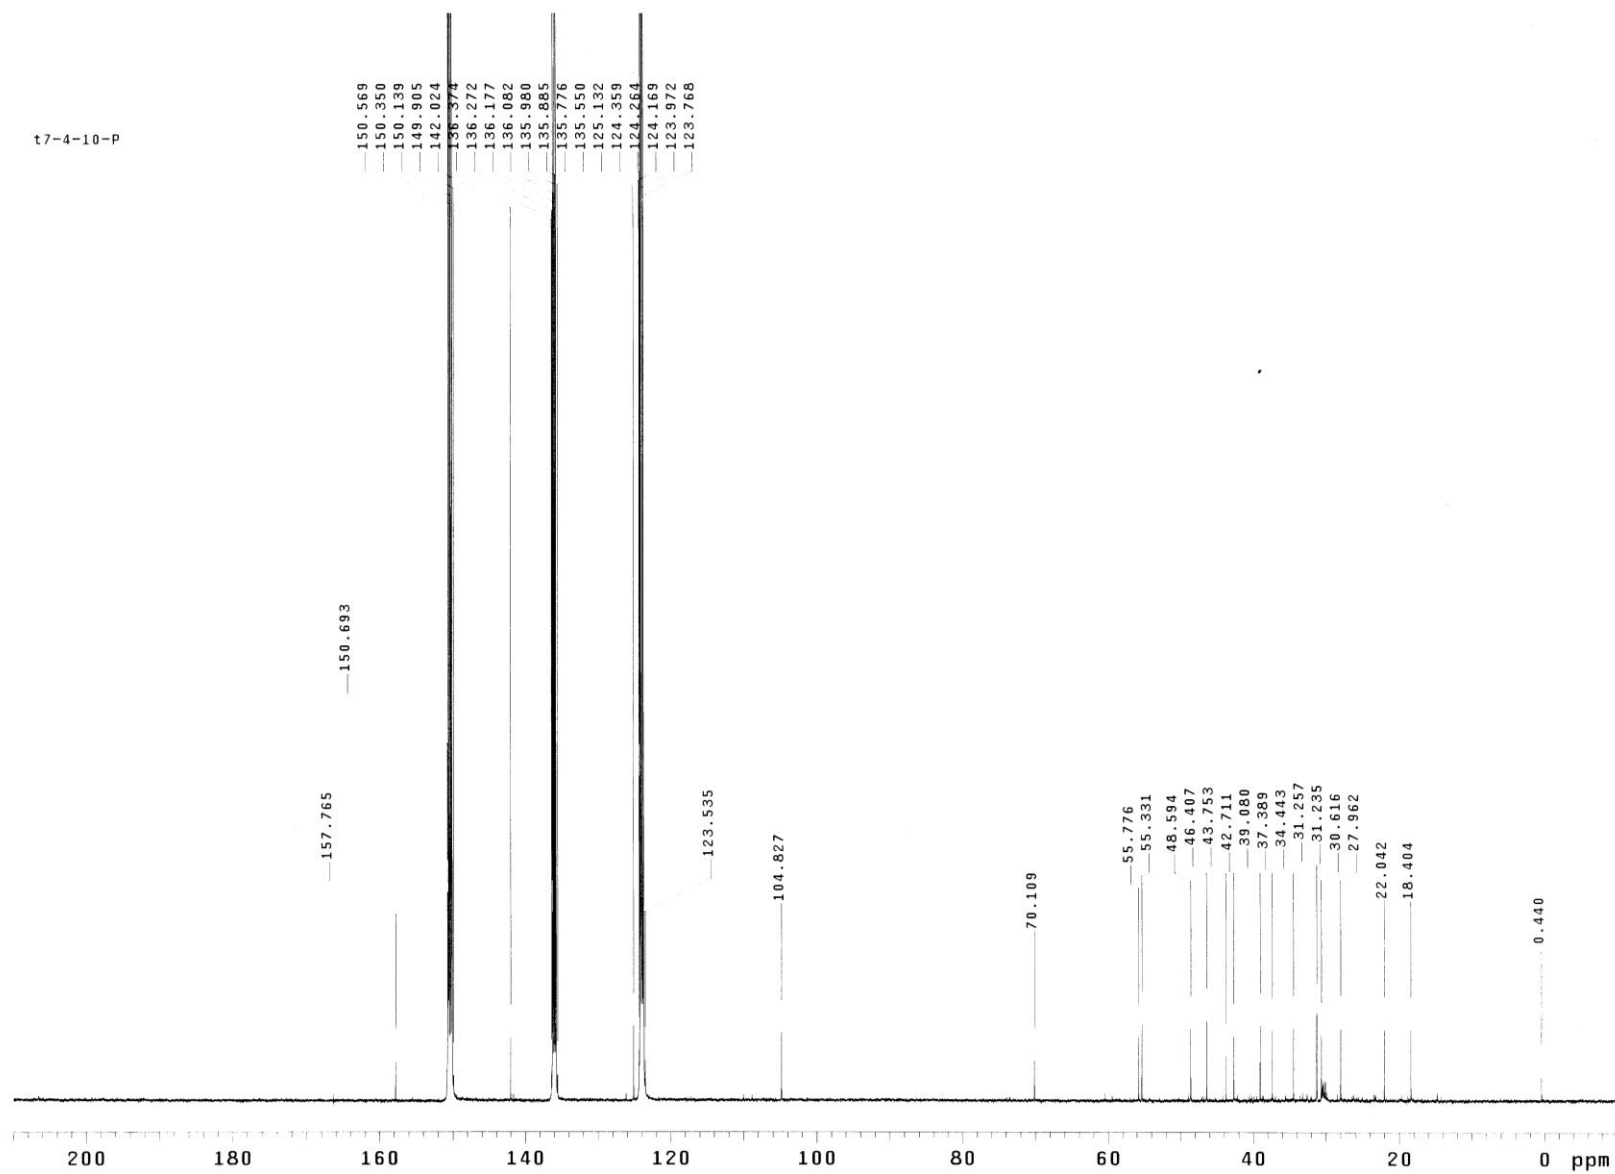

**Figure S9.** HMQC spectrum of **1** in pyridine- $d_5$ .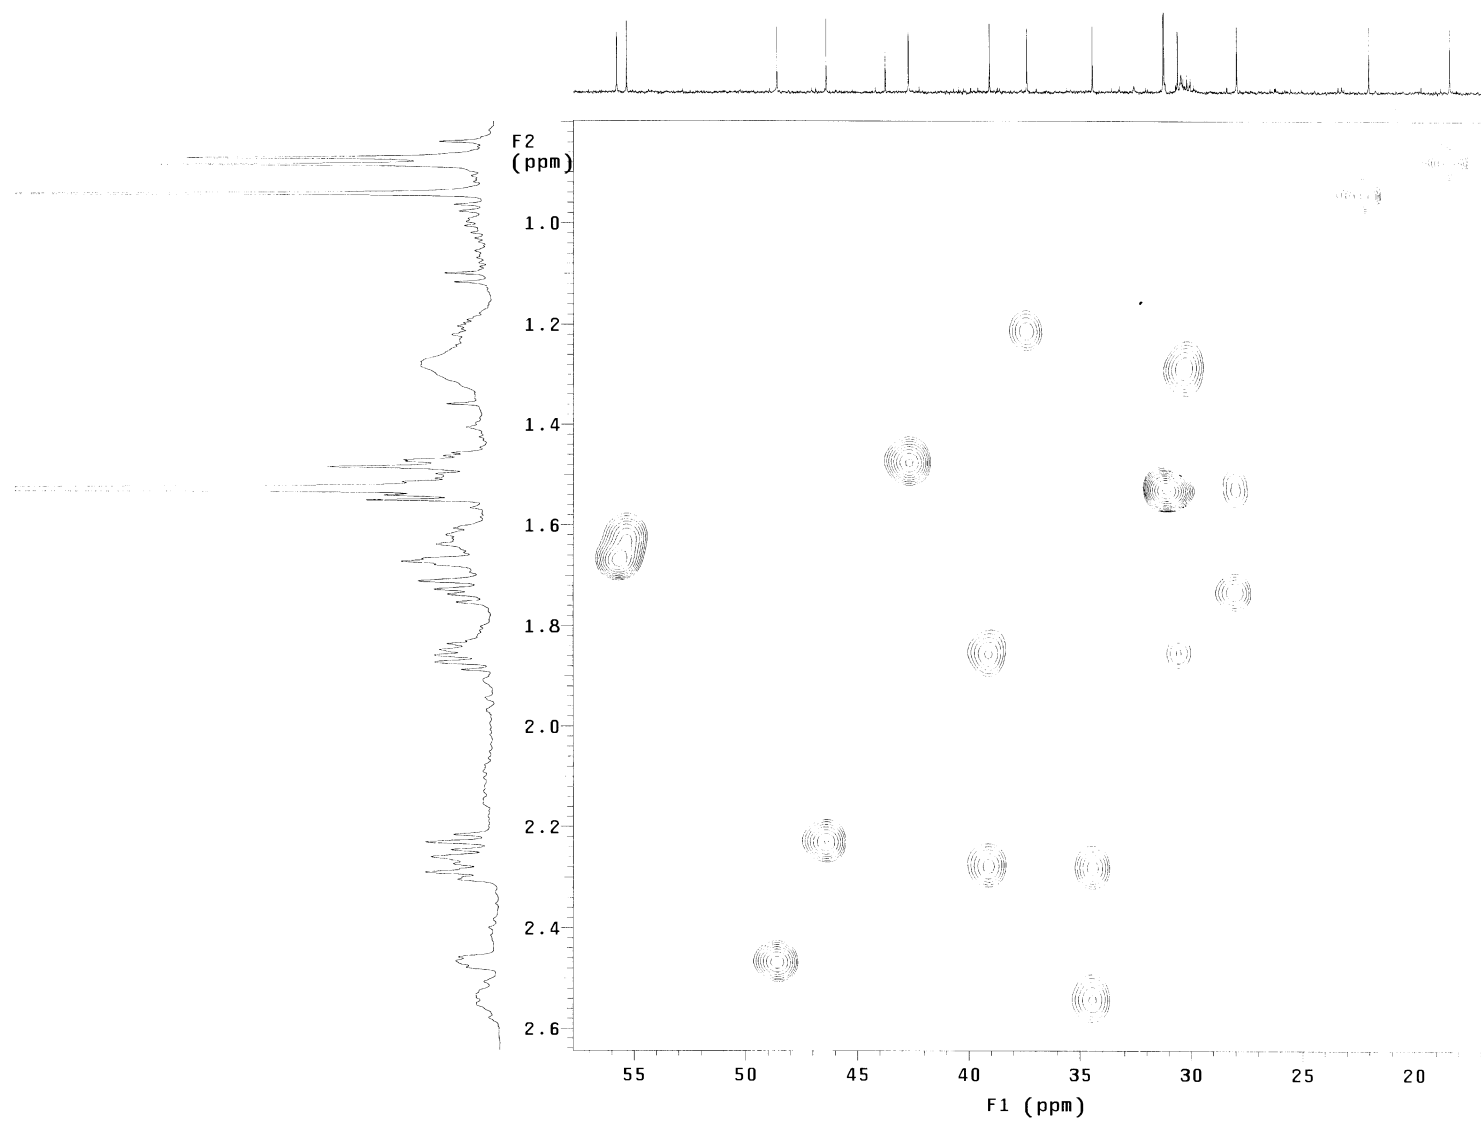

**Figure S10.** HMBC spectrum of **1** in pyridine-*d*<sub>5</sub>.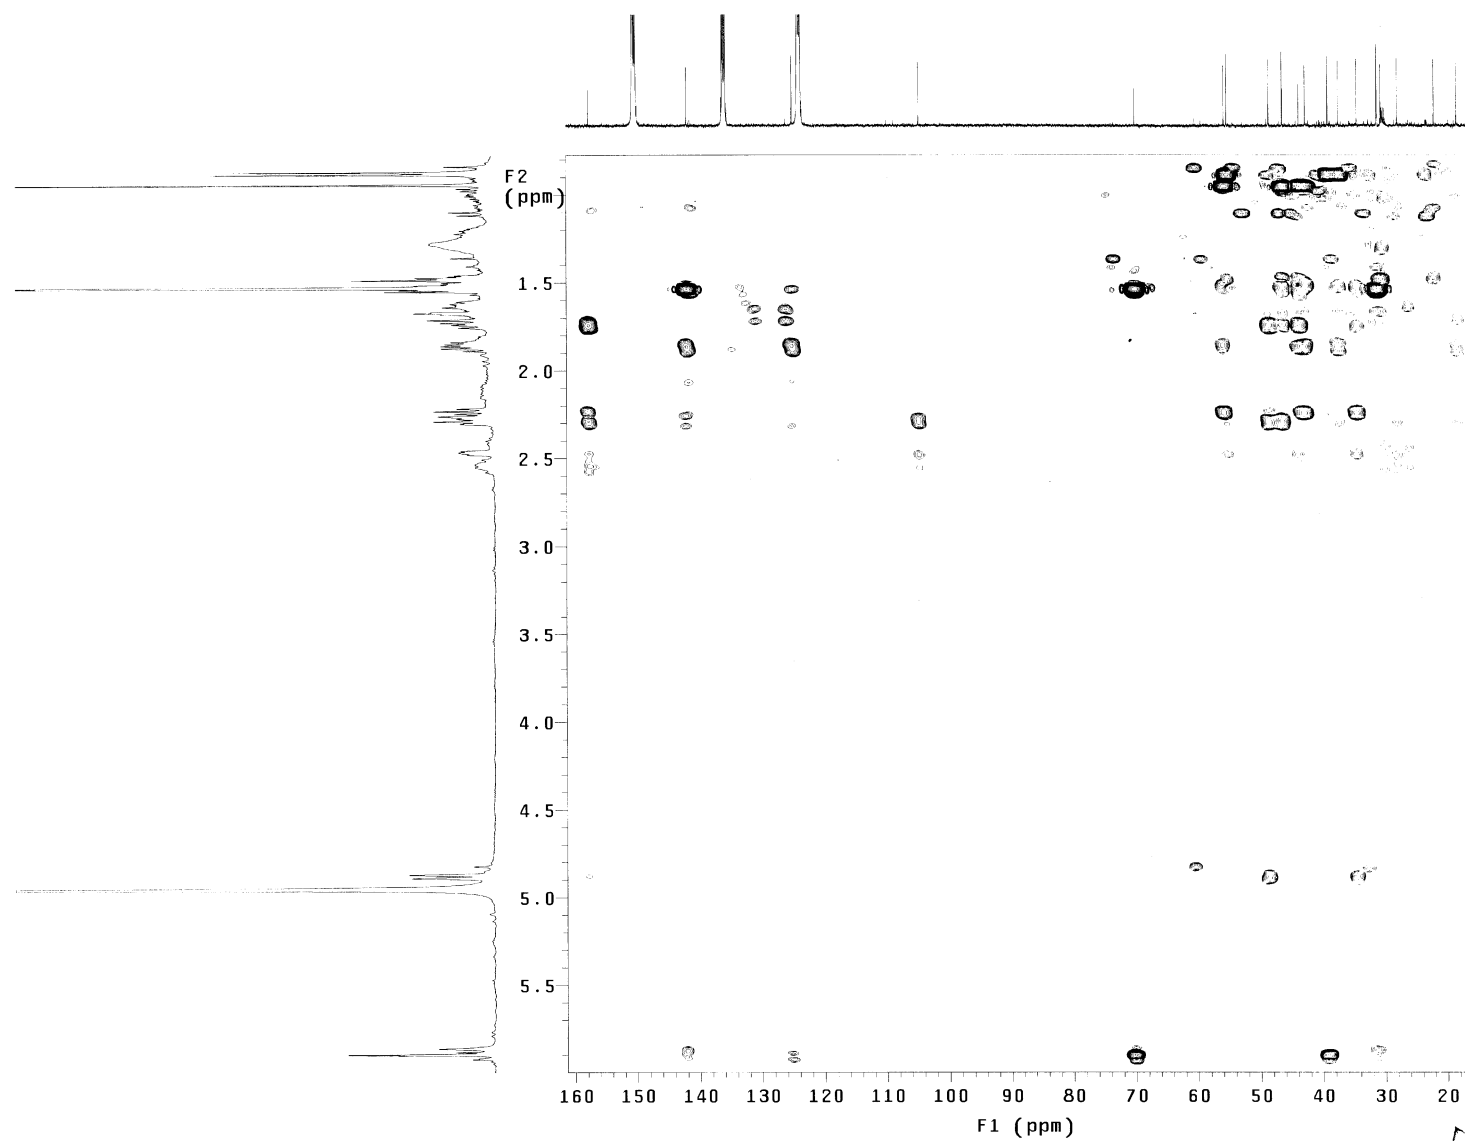

BC

**Figure S11.**  $^1\text{H}$ - $^1\text{H}$  COSY spectrum of **1** in pyridine- $d_5$ .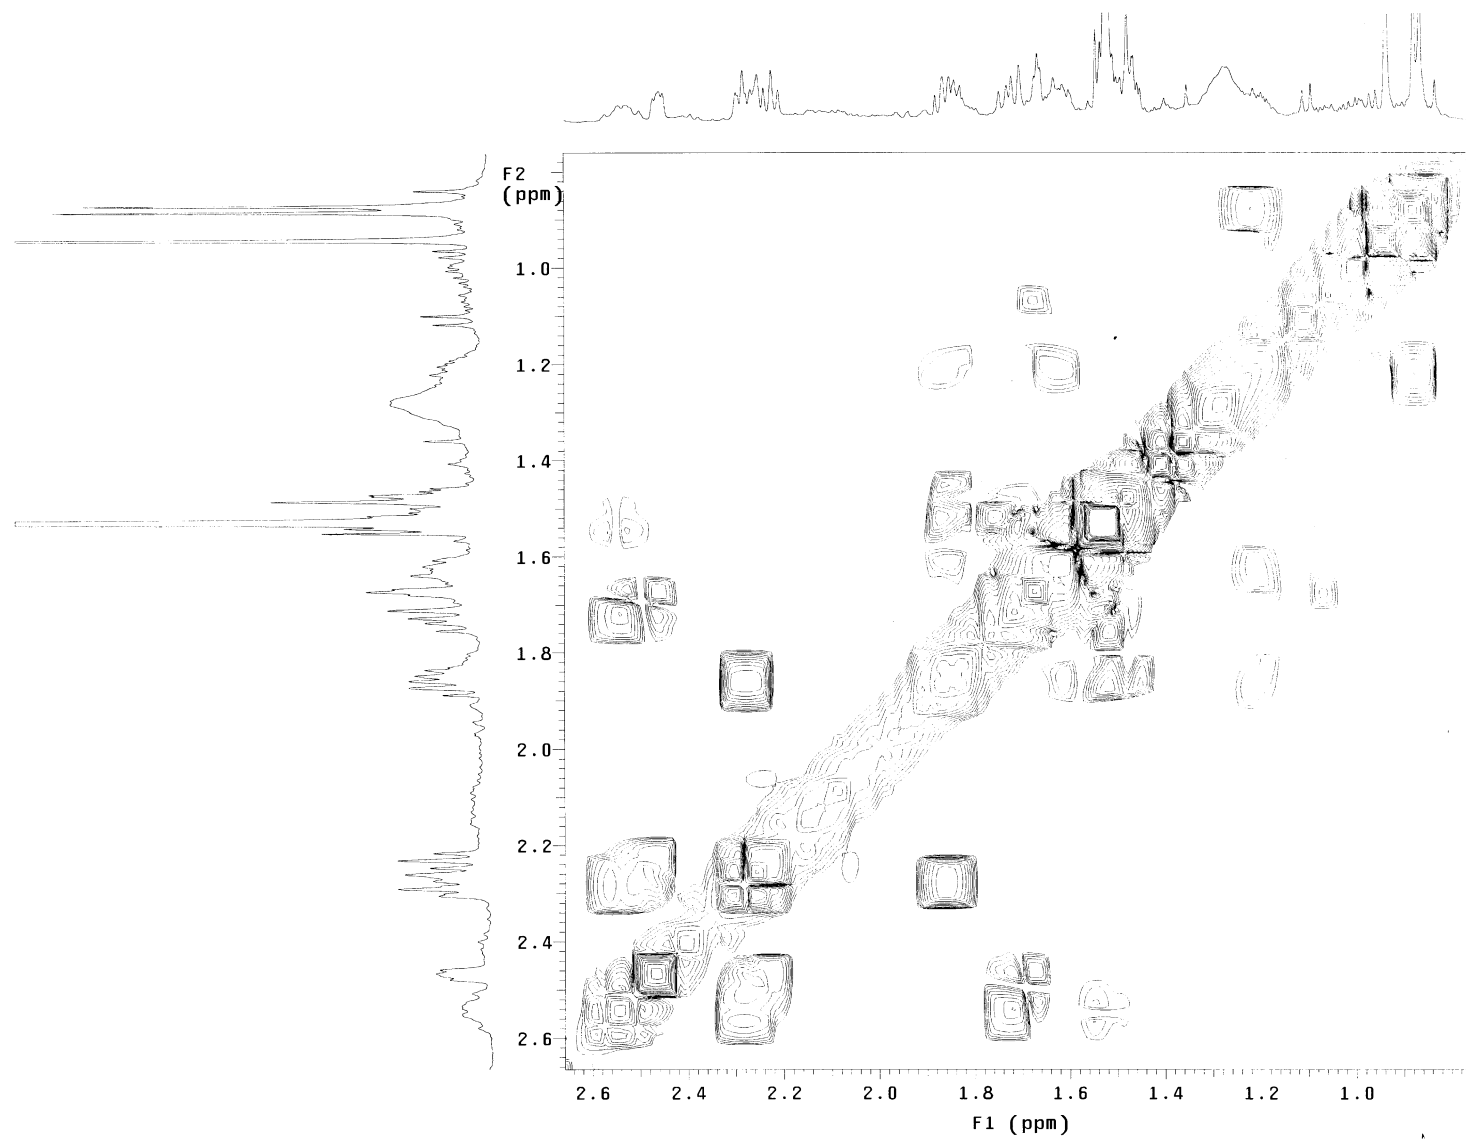

cosy

**Figure S12.** NOESY spectrum of **1** in pyridine-*d*<sub>5</sub>.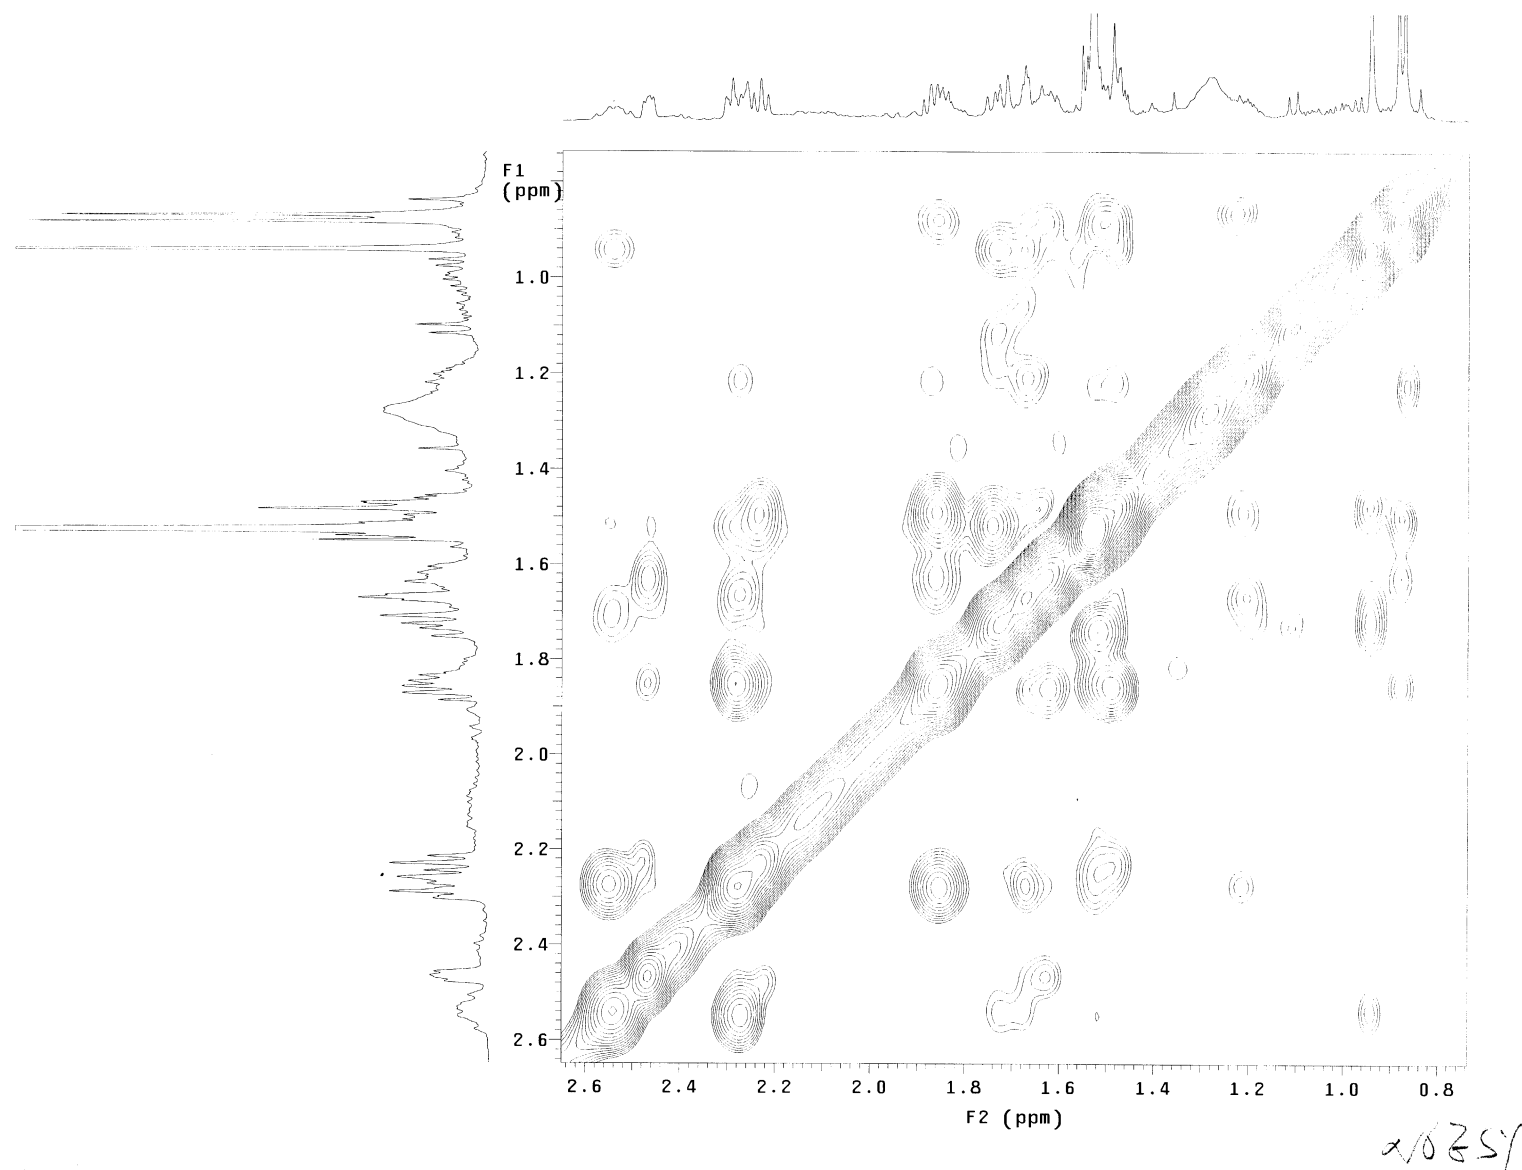

Supplement: Supplementary File 1 — Supporting Information (PDF, 782 KB) [file marinedrugs-11-00114-s001.pdf]
