# Supplementary material for: A New Spatane Diterpenoid from the Cultured Soft Coral Sinularia leptoclados
Source: MDPI journal article supplement (doi:10.3390/md11010114), 2013-01-10
Supplement: s2 [file s2]

marinedrugs-11-00114-s001.mol
  corina  07071423053D 1   1.00000     0.00000 
CORINA 3.49 0023  12.04.2013
 24 26  0  0  0  0  0  0  0  0999 V2000
   -0.0169    1.5664    0.0462 C   0  0  0  0  0  0  0  0  0  0  0  0
   -0.0236    0.0227    0.0148 C   0  0  0  0  0  0  0  0  0  0  0  0
    1.3527    0.0930   -0.6617 C   0  0  0  0  0  0  0  0  0  0  0  0
    1.5166    1.4851   -0.0044 C   0  0  0  0  0  0  0  0  0  0  0  0
   -0.6359    1.9861   -1.3022 C   0  0  0  0  0  0  0  0  0  0  0  0
   -1.5519    0.8254   -1.7176 C   0  0  0  0  0  0  0  0  0  0  0  0
   -1.1517   -0.3817   -0.9021 C   0  0  0  0  0  0  0  0  0  0  0  0
    2.3968   -0.8254   -0.0011 C   0  0  0  0  0  0  0  0  0  0  0  0
    3.1492    0.0341    1.0353 C   0  0  0  0  0  0  0  0  0  0  0  0
    2.1614    1.1799    1.3680 C   0  0  0  0  0  0  0  0  0  0  0  0
   -1.6906   -1.5732   -0.9780 C   0  0  0  0  0  0  0  0  0  0  0  0
    3.3742   -1.3502   -1.0548 C   0  0  0  0  0  0  0  0  0  0  0  0
    2.6052   -2.1429   -2.1137 C   0  0  0  0  0  0  0  0  0  0  0  0
    3.5475   -2.5553   -3.2150 C   0  0  0  0  0  0  0  0  0  0  0  0
    3.6529   -3.8178   -3.5484 C   0  0  0  0  0  0  0  0  0  0  0  0
    4.5952   -4.2303   -4.6497 C   0  0  0  0  0  0  0  0  0  0  0  0
    5.2544   -3.0743   -5.1704 O   0  0  0  0  0  0  0  0  0  0  0  0
    5.6362   -5.2033   -4.0925 C   0  0  0  0  0  0  0  0  0  0  0  0
    3.8052   -4.9138   -5.7676 C   0  0  0  0  0  0  0  0  0  0  0  0
    4.4054   -2.2607   -0.3852 C   0  0  0  0  0  0  0  0  0  0  0  0
    2.2165    2.5581   -0.8409 C   0  0  0  0  0  0  0  0  0  0  0  0
    1.3436    0.0759   -1.7516 H   0  0  0  0  0  0  0  0  0  0  0  0
   -0.0322   -0.4636    0.9903 H   0  0  0  0  0  0  0  0  0  0  0  0
   -0.4428    2.0393    0.9311 H   0  0  0  0  0  0  0  0  0  0  0  0
  1  2  1  0      
  2  3  1  0      
  3  4  1  0      
  4  1  1  0      
  1  5  1  0      
  5  6  1  0      
  6  7  1  0      
  7  2  1  0      
  3  8  1  0      
  8  9  1  0      
  9 10  1  0      
 10  4  1  0      
  7 11  2  0      
  8 12  1  0      
 12 13  1  0      
 13 14  1  0      
 14 15  2  0      
 15 16  1  0      
 16 17  1  0      
 16 18  1  0      
 16 19  1  0      
 12 20  1  0      
  4 21  1  0      
  3 22  1  0      
  2 23  1  0      
  1 24  1  0      
M  END
$$$$
