# Supplementary material for: A New Spatane Diterpenoid from the Cultured Soft Coral Sinularia leptoclados
Source: MDPI journal article supplement (doi:10.3390/md11010114), 2013-01-10
Supplement: s3 [file s3]

marinedrugs-11-00114-s001.mol
  ChemDraw06021422252D

 24 26  0  0  0  0  0  0  0  0999 V2000
   -0.7888    2.2709    0.0000 C   0  0  0  0  0  0  0  0  0  0  0  0
   -0.7888    1.4459    0.0000 C   0  0  0  0  0  0  0  0  0  0  0  0
    0.0362    1.4459    0.0000 C   0  0  0  0  0  0  0  0  0  0  0  0
    0.0362    2.2709    0.0000 C   0  0  0  0  0  0  0  0  0  0  0  0
   -1.5734    2.5258    0.0000 C   0  0  0  0  0  0  0  0  0  0  0  0
   -2.0583    1.8584    0.0000 C   0  0  0  0  0  0  0  0  0  0  0  0
   -1.5734    1.1909    0.0000 C   0  0  0  0  0  0  0  0  0  0  0  0
    0.8208    1.1909    0.0000 C   0  0  0  0  0  0  0  0  0  0  0  0
    1.3058    1.8584    0.0000 C   0  0  0  0  0  0  0  0  0  0  0  0
    0.8208    2.5258    0.0000 C   0  0  0  0  0  0  0  0  0  0  0  0
   -1.9859    0.4765    0.0000 C   0  0  0  0  0  0  0  0  0  0  0  0
    1.2333    0.4765    0.0000 C   0  0  0  0  0  0  0  0  0  0  0  0
    0.8208   -0.2380    0.0000 C   0  0  0  0  0  0  0  0  0  0  0  0
    1.2333   -0.9525    0.0000 C   0  0  0  0  0  0  0  0  0  0  0  0
    0.8208   -1.6669    0.0000 C   0  0  0  0  0  0  0  0  0  0  0  0
    1.2333   -2.3814    0.0000 C   0  0  0  0  0  0  0  0  0  0  0  0
    1.6458   -3.0959    0.0000 O   0  0  0  0  0  0  0  0  0  0  0  0
    0.8208   -3.0959    0.0000 C   0  0  0  0  0  0  0  0  0  0  0  0
    2.0583   -2.3814    0.0000 C   0  0  0  0  0  0  0  0  0  0  0  0
    2.0583    0.4765    0.0000 C   0  0  0  0  0  0  0  0  0  0  0  0
    0.0362    3.0959    0.0000 C   0  0  0  0  0  0  0  0  0  0  0  0
    0.0362    0.6209    0.0000 H   0  0  0  0  0  0  0  0  0  0  0  0
   -0.7888    0.6209    0.0000 H   0  0  0  0  0  0  0  0  0  0  0  0
   -0.7888    3.0959    0.0000 H   0  0  0  0  0  0  0  0  0  0  0  0
  1  2  1  0      
  2  3  1  0      
  3  4  1  0      
  4  1  1  0      
  1  5  1  0      
  5  6  1  0      
  6  7  1  0      
  7  2  1  0      
  3  8  1  0      
  8  9  1  0      
  9 10  1  0      
 10  4  1  0      
  7 11  2  0      
  8 12  1  6      
 12 13  1  0      
 13 14  1  0      
 14 15  2  0      
 15 16  1  0      
 16 17  1  0      
 16 18  1  0      
 16 19  1  0      
 12 20  1  1      
  4 21  1  6      
  3 22  1  6      
  2 23  1  1      
  1 24  1  1      
M  END
