# Supplementary material for: A New Spatane Diterpenoid from the Cultured Soft Coral Sinularia leptoclados
Source: MDPI journal article supplement (doi:10.3390/md11010114), 2013-01-10
Supplement: s6 [file s6]

marinedrugs-11-00114-s003.mol
  ChemDraw06021422252D

 26 28  0  0  0  0  0  0  0  0999 V2000
   -1.5019   -1.8393    0.0000 O   0  0  0  0  0  0  0  0  0  0  0  0
   -0.6769   -1.8393    0.0000 C   0  0  0  0  0  0  0  0  0  0  0  0
   -0.3057   -1.1175    0.0000 C   0  0  0  0  0  0  0  0  0  0  0  0
   -1.0894   -0.5698    0.0000 C   0  0  0  0  0  0  0  0  0  0  0  0
   -1.8732   -1.1175    0.0000 C   0  0  0  0  0  0  0  0  0  0  0  0
    0.4088   -0.7050    0.0000 C   0  0  0  0  0  0  0  0  0  0  0  0
    1.2338   -0.7050    0.0000 C   0  0  0  0  0  0  0  0  0  0  0  0
    1.6463    0.0095    0.0000 C   0  0  0  0  0  0  0  0  0  0  0  0
    1.2338    0.7240    0.0000 C   0  0  0  0  0  0  0  0  0  0  0  0
    0.4088    0.7240    0.0000 C   0  0  0  0  0  0  0  0  0  0  0  0
   -0.1746    1.3074    0.0000 C   0  0  0  0  0  0  0  0  0  0  0  0
   -1.1719    1.1513    0.0000 C   0  0  0  0  0  0  0  0  0  0  0  0
   -1.8938    1.7288    0.0000 C   0  0  0  0  0  0  0  0  0  0  0  0
   -2.6982    0.9244    0.0000 C   0  0  0  0  0  0  0  0  0  0  0  0
   -2.0588    0.0788    0.0000 C   0  0  0  0  0  0  0  0  0  0  0  0
   -2.5876   -0.7050    0.0000 C   0  0  0  0  0  0  0  0  0  0  0  0
   -1.1719    0.3263    0.0000 O   0  0  0  0  0  0  0  0  0  0  0  0
   -0.1746    0.1406    0.0000 O   0  0  0  0  0  0  0  0  0  0  0  0
   -0.2644   -2.5538    0.0000 O   0  0  0  0  0  0  0  0  0  0  0  0
   -0.6769    0.1447    0.0000 O   0  0  0  0  0  0  0  0  0  0  0  0
    2.4713    0.0095    0.0000 C   0  0  0  0  0  0  0  0  0  0  0  0
   -1.1719    1.9763    0.0000 H   0  0  0  0  0  0  0  0  0  0  0  0
   -2.8838    0.0788    0.0000 C   0  0  0  0  0  0  0  0  0  0  0  0
   -1.8938    2.5538    0.0000 O   0  0  0  0  0  0  0  0  0  0  0  0
    2.8838    0.7240    0.0000 C   0  0  0  0  0  0  0  0  0  0  0  0
    2.8838   -0.7050    0.0000 C   0  0  0  0  0  0  0  0  0  0  0  0
  1  2  1  0      
  2  3  1  0      
  3  4  1  0      
  4  5  1  0      
  3  6  2  0      
  6  7  1  0      
  7  8  1  0      
  8  9  1  0      
  9 10  1  0      
 10 11  1  0      
 11 12  1  0      
 12 13  1  0      
 13 14  1  0      
 14 15  1  0      
  5 16  1  0      
 15 16  1  0      
 12 17  1  0      
 15 17  1  0      
 10 18  2  0      
  2 19  2  0      
  4 20  1  6      
  8 21  1  6      
 15 23  1  1      
 13 24  2  0      
  5  1  1  1      
 21 25  1  0      
 21 26  2  0      
 12 22  1  6      
M  END
