# Supplementary material for: A New Spatane Diterpenoid from the Cultured Soft Coral Sinularia leptoclados
Source: MDPI journal article supplement (doi:10.3390/md11010114), 2013-01-10
Supplement: s8 [file s8]

marinedrugs-11-00114-s004.mol
  corina  07071423053D 1   1.00000     0.00000 
CORINA 3.49 0023  12.04.2013
 34 38  0  0  0  0  0  0  0  0999 V2000
   -0.0191    1.7993    0.0764 C   0  0  0  0  0  0  0  0  0  0  0  0
    0.0121    0.2752    0.1595 C   0  0  0  0  0  0  0  0  0  0  0  0
    0.6432   -0.3151   -1.1043 C   0  0  0  0  0  0  0  0  0  0  0  0
    2.0584    0.2119   -1.3204 C   0  0  0  0  0  0  0  0  0  0  0  0
    2.1511    1.7226   -1.1776 C   0  0  0  0  0  0  0  0  0  0  0  0
    1.4170    2.3186    0.0370 C   0  0  0  0  0  0  0  0  0  0  0  0
    2.6478   -0.2912   -2.6145 C   0  0  0  0  0  0  0  0  0  0  0  0
    2.3822    0.5188   -3.8518 C   0  0  0  0  0  0  0  0  0  0  0  0
    2.6481    1.9908   -3.7619 C   0  0  0  0  0  0  0  0  0  0  0  0
    2.4293    2.6100   -2.3809 C   0  0  0  0  0  0  0  0  0  0  0  0
    1.9426    2.8178   -4.7993 C   0  0  0  0  0  0  0  0  0  0  0  0
    2.4839    4.2632   -4.7581 C   0  0  0  0  0  0  0  0  0  0  0  0
    2.2772    4.9283   -3.4303 C   0  0  0  0  0  0  0  0  0  0  0  0
    1.7447    3.9853   -2.3560 C   0  0  0  0  0  0  0  0  0  0  0  0
    2.2404    2.4572   -6.2740 C   0  0  0  0  0  0  0  0  0  0  0  0
    1.7117    3.7249   -7.0073 C   0  0  0  0  0  0  0  0  0  0  0  0
    1.8292    4.8924   -5.9917 C   0  0  0  0  0  0  0  0  0  0  0  0
    2.7352    5.9881   -6.5583 C   0  0  0  0  0  0  0  0  0  0  0  0
    3.9981    4.2693   -5.0327 C   0  0  0  0  0  0  0  0  0  0  0  0
    3.7356    2.0725   -3.9481 H   0  0  0  0  0  0  0  0  0  0  0  0
    3.5520    2.3499   -1.3717 C   0  0  0  0  0  0  0  0  0  0  0  0
    0.7017   -1.8413   -0.9067 C   0  0  0  0  0  0  0  0  0  0  0  0
    0.7620   -0.1374    1.3036 O   0  0  0  0  0  0  0  0  0  0  0  0
    0.8530    5.2947   -5.7474 H   0  0  0  0  0  0  0  0  0  0  0  0
    2.8725    7.1165   -5.5342 C   0  0  0  0  0  0  0  0  0  0  0  0
    0.4166    2.7733   -4.6230 C   0  0  0  0  0  0  0  0  0  0  0  0
   -0.2647   -0.0204   -2.2953 C   0  0  0  0  0  0  0  0  0  0  0  0
    2.1228    6.5406   -7.8469 C   0  0  0  0  0  0  0  0  0  0  0  0
    3.0724    7.5311   -8.4699 C   0  0  0  0  0  0  0  0  0  0  0  0
    3.4624    7.3733   -9.7106 C   0  0  0  0  0  0  0  0  0  0  0  0
    4.4120    8.3638  -10.3336 C   0  0  0  0  0  0  0  0  0  0  0  0
    4.7392    9.3755   -9.3789 O   0  0  0  0  0  0  0  0  0  0  0  0
    5.6886    7.6418  -10.7694 C   0  0  0  0  0  0  0  0  0  0  0  0
    3.7492    9.0084  -11.5527 C   0  0  0  0  0  0  0  0  0  0  0  0
  1  2  1  0      
  2  3  1  0      
  3  4  1  0      
  4  5  1  0      
  5  6  1  0      
  6  1  1  0      
  4  7  1  0      
  7  8  1  0      
  8  9  1  0      
  9 10  1  0      
 10  5  1  0      
  9 11  1  0      
 11 12  1  0      
 12 13  1  0      
 13 14  1  0      
 14 10  1  0      
 11 15  1  0      
 15 16  1  0      
 16 17  1  0      
 17 12  1  0      
 18 17  1  0      
 12 19  1  0      
  9 20  1  0      
 10 21  1  0      
  5 21  1  0      
  3 22  1  0      
  2 23  1  0      
 17 24  1  0      
 18 25  1  0      
 11 26  1  0      
  3 27  1  0      
 18 28  1  0      
 28 29  1  0      
 29 30  2  0      
 30 31  1  0      
 31 32  1  0      
 31 33  1  0      
 31 34  1  0      
M  END
$$$$
