# Supplementary material for: A New Spatane Diterpenoid from the Cultured Soft Coral Sinularia leptoclados
Source: MDPI journal article supplement (doi:10.3390/md11010114), 2013-01-10
Supplement: s9 [file s9]

marinedrugs-11-00114-s004.mol
  ChemDraw06021422252D

 34 38  0  0  0  0  0  0  0  0999 V2000
   -3.7509   -0.4388    0.0000 C   0  0  0  0  0  0  0  0  0  0  0  0
   -3.7509   -1.2638    0.0000 C   0  0  0  0  0  0  0  0  0  0  0  0
   -3.0364   -1.6763    0.0000 C   0  0  0  0  0  0  0  0  0  0  0  0
   -2.3219   -1.2638    0.0000 C   0  0  0  0  0  0  0  0  0  0  0  0
   -2.3219   -0.4388    0.0000 C   0  0  0  0  0  0  0  0  0  0  0  0
   -3.0364   -0.0263    0.0000 C   0  0  0  0  0  0  0  0  0  0  0  0
   -1.6075   -1.6763    0.0000 C   0  0  0  0  0  0  0  0  0  0  0  0
   -0.8930   -1.2638    0.0000 C   0  0  0  0  0  0  0  0  0  0  0  0
   -0.8930   -0.4388    0.0000 C   0  0  0  0  0  0  0  0  0  0  0  0
   -1.6075   -0.0263    0.0000 C   0  0  0  0  0  0  0  0  0  0  0  0
   -0.1785   -0.0263    0.0000 C   0  0  0  0  0  0  0  0  0  0  0  0
   -0.1785    0.7987    0.0000 C   0  0  0  0  0  0  0  0  0  0  0  0
   -0.8930    1.2112    0.0000 C   0  0  0  0  0  0  0  0  0  0  0  0
   -1.6075    0.7987    0.0000 C   0  0  0  0  0  0  0  0  0  0  0  0
    0.6061   -0.2812    0.0000 C   0  0  0  0  0  0  0  0  0  0  0  0
    1.0910    0.3862    0.0000 C   0  0  0  0  0  0  0  0  0  0  0  0
    0.6061    1.0537    0.0000 C   0  0  0  0  0  0  0  0  0  0  0  0
    0.9417    1.8074    0.0000 C   0  0  0  0  0  0  0  0  0  0  0  0
   -0.1785    1.6237    0.0000 C   0  0  0  0  0  0  0  0  0  0  0  0
   -0.8930    0.3862    0.0000 H   0  0  0  0  0  0  0  0  0  0  0  0
   -2.3219    0.3862    0.0000 C   0  0  0  0  0  0  0  0  0  0  0  0
   -2.4530   -2.2596    0.0000 C   0  0  0  0  0  0  0  0  0  0  0  0
   -4.4653   -1.6763    0.0000 O   0  0  0  0  0  0  0  0  0  0  0  0
    1.4030    1.2672    0.0000 H   0  0  0  0  0  0  0  0  0  0  0  0
    0.3583    2.3907    0.0000 C   0  0  0  0  0  0  0  0  0  0  0  0
   -0.1785   -0.8513    0.0000 C   0  0  0  0  0  0  0  0  0  0  0  0
   -3.4489   -2.3907    0.0000 C   0  0  0  0  0  0  0  0  0  0  0  0
    1.7386    2.0209    0.0000 C   0  0  0  0  0  0  0  0  0  0  0  0
    2.3219    1.4375    0.0000 C   0  0  0  0  0  0  0  0  0  0  0  0
    3.0364    1.8500    0.0000 C   0  0  0  0  0  0  0  0  0  0  0  0
    3.7509    1.4375    0.0000 C   0  0  0  0  0  0  0  0  0  0  0  0
    4.4653    1.0250    0.0000 O   0  0  0  0  0  0  0  0  0  0  0  0
    3.7509    0.6125    0.0000 C   0  0  0  0  0  0  0  0  0  0  0  0
    4.4653    1.8500    0.0000 C   0  0  0  0  0  0  0  0  0  0  0  0
  1  2  1  0      
  2  3  1  0      
  3  4  1  0      
  4  5  1  0      
  5  6  1  0      
  6  1  1  0      
  4  7  1  0      
  7  8  1  0      
  8  9  1  0      
  9 10  1  0      
 10  5  1  0      
  9 11  1  0      
 11 12  1  0      
 12 13  1  0      
 13 14  1  0      
 14 10  1  0      
 11 15  1  0      
 15 16  1  0      
 16 17  1  0      
 17 12  1  0      
 18 17  1  0      
 12 19  1  1      
  9 20  1  1      
 10 21  1  1      
  5 21  1  1      
  3 22  1  1      
  2 23  1  1      
 17 24  1  6      
 18 25  1  6      
 11 26  1  6      
  3 27  1  6      
 18 28  1  0      
 28 29  1  0      
 29 30  2  0      
 30 31  1  0      
 31 32  1  0      
 31 33  1  0      
 31 34  1  0      
M  END
