# Supplementary material for: A New Spatane Diterpenoid from the Cultured Soft Coral Sinularia leptoclados
Source: MDPI journal article supplement (doi:10.3390/md11010114), 2013-01-10
Supplement: s10 [file s10]

marinedrugs-11-00114-s005.mol
  corina  07071423053D 1   1.00000     0.00000 
CORINA 3.49 0023  12.04.2013
 34 38  0  0  0  0  0  0  0  0999 V2000
    2.4763    0.6736    0.3130 C   0  0  0  0  0  0  0  0  0  0  0  0
    2.5928   -0.8484    0.2859 C   0  0  0  0  0  0  0  0  0  0  0  0
    3.0294   -1.3253   -1.1017 C   0  0  0  0  0  0  0  0  0  0  0  0
    4.3617   -0.7055   -1.5118 C   0  0  0  0  0  0  0  0  0  0  0  0
    4.4059    0.7968   -1.2839 C   0  0  0  0  0  0  0  0  0  0  0  0
    3.8592    1.2764    0.0728 C   0  0  0  0  0  0  0  0  0  0  0  0
    4.7481   -1.0963   -2.9165 C   0  0  0  0  0  0  0  0  0  0  0  0
    4.2402   -0.2311   -4.0352 C   0  0  0  0  0  0  0  0  0  0  0  0
    4.4479    1.2458   -3.8905 C   0  0  0  0  0  0  0  0  0  0  0  0
    4.4356    1.7685   -2.4533 C   0  0  0  0  0  0  0  0  0  0  0  0
    3.5398    2.0906   -4.7387 C   0  0  0  0  0  0  0  0  0  0  0  0
    4.0116    3.5599   -4.6890 C   0  0  0  0  0  0  0  0  0  0  0  0
    4.0001    4.1322   -3.3032 C   0  0  0  0  0  0  0  0  0  0  0  0
    3.7010    3.0981   -2.2225 C   0  0  0  0  0  0  0  0  0  0  0  0
    3.6019    1.8358   -6.2634 C   0  0  0  0  0  0  0  0  0  0  0  0
    2.8983    3.1120   -6.8116 C   0  0  0  0  0  0  0  0  0  0  0  0
    3.1299    4.2222   -5.7522 C   0  0  0  0  0  0  0  0  0  0  0  0
    3.8750    5.4000   -6.3845 C   0  0  0  0  0  0  0  0  0  0  0  0
    5.4560    3.6698   -5.2084 C   0  0  0  0  0  0  0  0  0  0  0  0
    5.4835    1.4011   -4.2474 H   0  0  0  0  0  0  0  0  0  0  0  0
    5.7230    1.5144   -1.6631 C   0  0  0  0  0  0  0  0  0  0  0  0
    3.1921   -2.8547   -1.0208 C   0  0  0  0  0  0  0  0  0  0  0  0
    3.5431   -1.2839    1.2600 O   0  0  0  0  0  0  0  0  0  0  0  0
    2.1908    4.5522   -5.3235 H   0  0  0  0  0  0  0  0  0  0  0  0
    4.1294    6.4718   -5.3227 C   0  0  0  0  0  0  0  0  0  0  0  0
    2.0690    1.9476   -4.3167 C   0  0  0  0  0  0  0  0  0  0  0  0
    1.9213   -1.0136   -2.1040 C   0  0  0  0  0  0  0  0  0  0  0  0
    3.0292    5.9915   -7.5139 C   0  0  0  0  0  0  0  0  0  0  0  0
    3.8128    7.0703   -8.2162 C   0  0  0  0  0  0  0  0  0  0  0  0
    3.9525    7.0363   -9.5183 C   0  0  0  0  0  0  0  0  0  0  0  0
    3.1765    6.0340  -10.3334 C   0  0  0  0  0  0  0  0  0  0  0  0
    1.8913    5.8319   -9.7421 O   0  0  0  0  0  0  0  0  0  0  0  0
    3.0047    6.5601  -11.7597 C   0  0  0  0  0  0  0  0  0  0  0  0
    3.9365    4.7065  -10.3675 C   0  0  0  0  0  0  0  0  0  0  0  0
  1  2  1  0      
  2  3  1  0      
  3  4  1  0      
  4  5  1  0      
  5  6  1  0      
  6  1  1  0      
  4  7  1  0      
  7  8  1  0      
  8  9  1  0      
  9 10  1  0      
 10  5  1  0      
  9 11  1  0      
 11 12  1  0      
 12 13  1  0      
 13 14  1  0      
 14 10  1  0      
 11 15  1  0      
 15 16  1  0      
 16 17  1  0      
 17 12  1  0      
 18 17  1  0      
 12 19  1  0      
  9 20  1  0      
 10 21  1  0      
  5 21  1  0      
  3 22  1  0      
  2 23  1  0      
 17 24  1  0      
 18 25  1  0      
 11 26  1  0      
  3 27  1  0      
 18 28  1  0      
 28 29  1  0      
 29 30  2  0      
 30 31  1  0      
 31 32  1  0      
 31 33  1  0      
 31 34  1  0      
M  END
$$$$
