# Supplementary material for: A New Spatane Diterpenoid from the Cultured Soft Coral Sinularia leptoclados
Source: MDPI journal article supplement (doi:10.3390/md11010114), 2013-01-10
Supplement: s11 [file s11]

marinedrugs-11-00114-s005.mol
  ChemDraw06021422262D

 34 38  0  0  0  0  0  0  0  0999 V2000
   -3.3936   -0.9934    0.0000 C   0  0  0  0  0  0  0  0  0  0  0  0
   -3.3936   -1.8184    0.0000 C   0  0  0  0  0  0  0  0  0  0  0  0
   -2.6792   -2.2309    0.0000 C   0  0  0  0  0  0  0  0  0  0  0  0
   -1.9647   -1.8184    0.0000 C   0  0  0  0  0  0  0  0  0  0  0  0
   -1.9647   -0.9934    0.0000 C   0  0  0  0  0  0  0  0  0  0  0  0
   -2.6792   -0.5809    0.0000 C   0  0  0  0  0  0  0  0  0  0  0  0
   -1.2502   -2.2309    0.0000 C   0  0  0  0  0  0  0  0  0  0  0  0
   -0.5357   -1.8184    0.0000 C   0  0  0  0  0  0  0  0  0  0  0  0
   -0.5357   -0.9934    0.0000 C   0  0  0  0  0  0  0  0  0  0  0  0
   -1.2502   -0.5809    0.0000 C   0  0  0  0  0  0  0  0  0  0  0  0
    0.1787   -0.5809    0.0000 C   0  0  0  0  0  0  0  0  0  0  0  0
    0.1787    0.2441    0.0000 C   0  0  0  0  0  0  0  0  0  0  0  0
   -0.5357    0.6566    0.0000 C   0  0  0  0  0  0  0  0  0  0  0  0
   -1.2502    0.2441    0.0000 C   0  0  0  0  0  0  0  0  0  0  0  0
    0.9633   -0.8358    0.0000 C   0  0  0  0  0  0  0  0  0  0  0  0
    1.4483   -0.1684    0.0000 C   0  0  0  0  0  0  0  0  0  0  0  0
    0.9633    0.4990    0.0000 C   0  0  0  0  0  0  0  0  0  0  0  0
    1.2989    1.2527    0.0000 C   0  0  0  0  0  0  0  0  0  0  0  0
    0.1787    1.0691    0.0000 C   0  0  0  0  0  0  0  0  0  0  0  0
   -0.5357   -0.1684    0.0000 H   0  0  0  0  0  0  0  0  0  0  0  0
   -1.9647   -0.1684    0.0000 C   0  0  0  0  0  0  0  0  0  0  0  0
   -2.0958   -2.8143    0.0000 C   0  0  0  0  0  0  0  0  0  0  0  0
   -4.1081   -2.2309    0.0000 O   0  0  0  0  0  0  0  0  0  0  0  0
    1.7602    0.7126    0.0000 H   0  0  0  0  0  0  0  0  0  0  0  0
    0.7155    1.8361    0.0000 C   0  0  0  0  0  0  0  0  0  0  0  0
    0.1787   -1.4059    0.0000 C   0  0  0  0  0  0  0  0  0  0  0  0
   -3.0917   -2.9454    0.0000 C   0  0  0  0  0  0  0  0  0  0  0  0
    2.0958    1.4662    0.0000 C   0  0  0  0  0  0  0  0  0  0  0  0
    2.6792    0.8829    0.0000 C   0  0  0  0  0  0  0  0  0  0  0  0
    3.3936    1.2954    0.0000 C   0  0  0  0  0  0  0  0  0  0  0  0
    3.3936    2.1204    0.0000 C   0  0  0  0  0  0  0  0  0  0  0  0
    3.3936    2.9454    0.0000 O   0  0  0  0  0  0  0  0  0  0  0  0
    4.1081    2.5329    0.0000 C   0  0  0  0  0  0  0  0  0  0  0  0
    2.6792    2.5329    0.0000 C   0  0  0  0  0  0  0  0  0  0  0  0
  1  2  1  0      
  2  3  1  0      
  3  4  1  0      
  4  5  1  0      
  5  6  1  0      
  6  1  1  0      
  4  7  1  0      
  7  8  1  0      
  8  9  1  0      
  9 10  1  0      
 10  5  1  0      
  9 11  1  0      
 11 12  1  0      
 12 13  1  0      
 13 14  1  0      
 14 10  1  0      
 11 15  1  0      
 15 16  1  0      
 16 17  1  0      
 17 12  1  0      
 18 17  1  0      
 12 19  1  1      
  9 20  1  1      
 10 21  1  1      
  5 21  1  1      
  3 22  1  1      
  2 23  1  1      
 17 24  1  6      
 18 25  1  6      
 11 26  1  6      
  3 27  1  6      
 18 28  1  0      
 28 29  1  0      
 29 30  2  0      
 30 31  1  0      
 31 32  1  0      
 31 33  1  0      
 31 34  1  0      
M  END
